# Supplementary material for: Establishment and Analysis of a Combined Diagnostic Model of Polycystic Ovary Syndrome with Random Forest and Artificial Neural Network
Source: Biomed Res Int. 2020 Aug 20;2020:2613091. doi: 10.1155/2020/2613091 (PMC7455828; doi:10.1155/2020/2613091)
Supplement: Supplementary 2 — Table S1: the selected 264 differentially expressed genes (DEGs) in GSE6798 dataset. [file 2613091.f2.xlsx]

## Sheet: de_gene_df
logFC	AveExpr	t	P.Value	adj.P.Val	B	v	g	name	p_c
-0.586647	7.00868	-6.51866	2.76355e-07	0.00557518	6.24081	6.55853	down	VSIG1	p<0.01
-0.416807	7.83097	-5.18664	1.24043e-05	0.0379579	3.041	4.90643	down	RAPH1	p<0.01
-0.662103	9.87632	-5.05973	1.78653e-05	0.0379579	2.73001	4.74799	down	MYH4	p<0.01
-0.401053	8.49603	-4.94622	2.47519e-05	0.0379579	2.45163	4.60639	down	GLG1	p<0.01
-0.439547	10.5348	-4.94125	2.51073e-05	0.0379579	2.43945	4.6002	down	MSS51	p<0.01
-0.451515	7.97708	-4.93151	2.58189e-05	0.0379579	2.41557	4.58806	down	CAMKK2	p<0.01
-0.318623	8.35216	-4.92453	2.63414e-05	0.0379579	2.39845	4.57936	down	SMIM11A	p<0.01
-0.78147	8.14101	-4.80943	3.6643e-05	0.0403051	2.11616	4.43601	down	RASSF3	p<0.01
-0.497394	7.47383	-4.80258	3.73696e-05	0.0403051	2.09935	4.42748	down	ADAM11	p<0.01
-0.417887	6.42691	-4.79711	3.79596e-05	0.0403051	2.08595	4.42068	down	VN1R5	p<0.01
-1.02004	7.99675	-4.71567	4.79257e-05	0.0483427	1.88635	4.31943	down	NANOS1	p<0.01
-0.308318	8.71582	-4.59239	6.81553e-05	0.0572285	1.58458	4.1665	down	MSL3	p<0.01
-0.364766	7.0575	-4.56098	7.45409e-05	0.057838	1.50778	4.12761	down	NFYC-AS1	p<0.01
-0.281557	8.94878	-4.47759	9.45136e-05	0.0680971	1.30413	4.02451	down	BRMS1	p<0.01
-0.389619	7.32103	-4.38255	0.00012378	0.0780598	1.07261	3.90735	down	LAMB2P1	p<0.01
-0.336863	7.97517	-4.38244	0.000123819	0.0780598	1.07234	3.90721	down	PPIB	p<0.01
-0.495658	8.18534	-4.36519	0.000130019	0.0794852	1.03039	3.88599	down	RIMKLA	p<0.01
-0.360141	7.40431	-4.34899	0.000136122	0.0807442	0.991008	3.86607	down	NPAS2	p<0.01
-0.499251	9.40407	-4.30543	0.00015397	0.0807442	0.885217	3.81256	down	GPD1	p<0.01
-0.279417	7.67433	-4.27013	0.000170108	0.0807442	0.799626	3.76928	down	LRRC27	p<0.01
-0.407388	8.1884	-4.26884	0.000170728	0.0807442	0.796498	3.76769	down	SLC29A1	p<0.01
-0.344396	9.80111	-4.266	0.000172103	0.0807442	0.789611	3.76421	down	TMOD1	p<0.01
-0.284829	8.43384	-4.19335	0.000211184	0.0946764	0.613855	3.67534	down	ST6GAL1	p<0.01
-0.389565	8.47003	-4.16925	0.000225984	0.0976585	0.555677	3.64592	down	CAPS	p<0.01
-0.263328	7.31766	-4.15501	0.000235206	0.0988549	0.521325	3.62855	down	LOC101927151	p<0.01
-0.404303	9.66776	-4.07872	0.000291265	0.113	0.337708	3.53571	down	TMEM182	p<0.01
-0.270799	7.07619	-4.05533	0.000310936	0.113951	0.281577	3.50733	down	SMIM8	p<0.01
-0.496805	8.14378	-4.04637	0.000318815	0.113951	0.260085	3.49646	down	PLEKHA6	p<0.01
-0.380912	6.43758	-4.04286	0.00032196	0.113951	0.251653	3.4922	down	NEMP1	p<0.01
-0.384822	7.43697	-4.02837	0.000335236	0.116382	0.216947	3.47465	down	ING2	p<0.01
-0.309603	8.37124	-3.98675	0.000376449	0.119381	0.117371	3.42429	down	CIB2	p<0.01
-0.466051	9.44767	-3.97345	0.000390638	0.119381	0.085598	3.40822	down	RNF13	p<0.01
-0.443633	9.66957	-3.97037	0.000393998	0.119381	0.0782441	3.40451	down	PDLIM7	p<0.01
-0.27138	7.32565	-3.96417	0.000400846	0.119381	0.0634471	3.39702	down	CYP3A43	p<0.01
-0.604736	7.23546	-3.93063	0.000439967	0.125013	-0.016512	3.35658	down	OSBPL7	p<0.01
-0.296159	6.77464	-3.89463	0.000486105	0.12506	-0.10213	3.31327	down	ACTG1P17	p<0.01
-0.338751	12.7616	-3.8874	0.000495925	0.12506	-0.119299	3.30458	down	TNNI2	p<0.01
-0.415582	6.97846	-3.87544	0.000512596	0.126111	-0.147681	3.29022	down	TAPBPL	p<0.01
-0.43034	7.73278	-3.86573	0.000526535	0.12798	-0.17071	3.27857	down	LOC728392	p<0.01
-0.74428	8.43931	-3.84838	0.000552362	0.131098	-0.21181	3.25778	down	RBM3	p<0.01
-0.277449	8.04826	-3.83099	0.000579482	0.131767	-0.252946	3.23696	down	LMNTD2-AS1	p<0.01
-0.646998	7.71	-3.82908	0.000582542	0.131767	-0.257466	3.23467	down	HPS4	p<0.01
-0.608318	8.16231	-3.82894	0.000582763	0.131767	-0.25779	3.23451	down	MRTFA	p<0.01
-0.374052	9.00625	-3.82532	0.000588607	0.131767	-0.266353	3.23017	down	LRRFIP2	p<0.01
-0.333227	7.13521	-3.82102	0.000595614	0.131767	-0.276508	3.22504	down	FRMD6	p<0.01
-0.344531	9.33952	-3.81507	0.000605457	0.131767	-0.290574	3.21792	down	SOS2	p<0.01
-0.678278	8.78967	-3.81044	0.000613228	0.131767	-0.301517	3.21238	down	LINC01854	p<0.01
-0.282199	8.77795	-3.81	0.000613964	0.131767	-0.302545	3.21186	down	PIK3C2B	p<0.01
-0.301634	12.7456	-3.79468	0.000640383	0.134414	-0.338694	3.19356	down	TNNT3	p<0.01
-0.428857	9.11041	-3.78658	0.000654792	0.134631	-0.357784	3.1839	down	SYNC	p<0.01
-0.407644	8.30342	-3.74778	0.00072833	0.13673	-0.449084	3.13767	down	ATP11A-AS1	p<0.01
-0.279652	7.19173	-3.73731	0.000749528	0.137463	-0.473689	3.12521	down	LINC02175	p<0.01
-0.287513	7.80427	-3.73029	0.00076406	0.138151	-0.490156	3.11687	down	PEF1	p<0.01
-0.388416	8.78999	-3.7289	0.000766972	0.138151	-0.493419	3.11522	down	MAP7D1	p<0.01
-0.3243	7.54066	-3.69721	0.000836344	0.141785	-0.567661	3.07761	down	LMBR1	p<0.01
-0.281123	8.88243	-3.69011	0.000852703	0.143354	-0.584266	3.0692	down	MAPK6	p<0.01
-0.356391	9.75622	-3.68114	0.000873816	0.144708	-0.605232	3.05858	down	LIMCH1	p<0.01
-0.309239	6.67684	-3.67622	0.000885615	0.145255	-0.616728	3.05276	down	FAM120C	p<0.01
-0.296367	7.06911	-3.64464	0.000965072	0.148938	-0.69036	3.01544	down	PRR22	p<0.01
-0.347122	9.5066	-3.62653	0.00101373	0.148938	-0.732498	2.99408	down	OAT	p<0.01
-0.335387	10.1273	-3.6239	0.00102099	0.148938	-0.738619	2.99098	down	SGCB	p<0.01
-0.404236	8.7148	-3.62203	0.00102619	0.148938	-0.74297	2.98877	down	SLC16A10	p<0.01
-0.270076	6.89189	-3.60473	0.00107544	0.150723	-0.783122	2.96841	down	FBXO39	p<0.01
-0.403023	7.35491	-3.60247	0.00108205	0.150723	-0.788369	2.96575	down	MFF-DT	p<0.01
-0.275124	6.66982	-3.5943	0.00110627	0.150723	-0.807324	2.95614	down	LOC100505841	p<0.01
-0.319186	9.66713	-3.59209	0.00111289	0.150723	-0.81243	2.95355	down	SMTNL2	p<0.01
-0.436812	7.45328	-3.58281	0.00114119	0.151327	-0.833932	2.94264	down	ACY3	p<0.01
-0.354191	7.09501	-3.57992	0.00115014	0.151327	-0.840628	2.93925	down	FLJ20712	p<0.01
-0.340549	7.40097	-3.57974	0.00115071	0.151327	-0.84105	2.93903	down	SLC22A18AS	p<0.01
-0.277926	8.0388	-3.54135	0.0012763	0.158904	-0.929713	2.89405	down	TBCD	p<0.01
-0.330901	6.84023	-3.53629	0.00129384	0.158904	-0.941395	2.88812	down	KRBOX1	p<0.01
-0.392723	8.77041	-3.53573	0.00129579	0.158904	-0.942682	2.88747	down	ZDHHC2	p<0.01
-0.456913	8.07509	-3.53238	0.00130752	0.158904	-0.950399	2.88355	down	DEFA4	p<0.01
-0.806959	8.36344	-3.50831	0.00139496	0.162258	-1.00577	2.85544	down	SHISA2	p<0.01
-0.349608	7.34579	-3.50723	0.001399	0.162258	-1.00825	2.85418	down	CMTM6	p<0.01
-0.307873	8.61212	-3.50573	0.00140464	0.162258	-1.01169	2.85243	down	SMTN	p<0.01
-0.404475	9.09719	-3.50056	0.00142428	0.162258	-1.02357	2.8464	down	ADPRHL1	p<0.01
-0.696212	6.91407	-3.49023	0.00146433	0.162258	-1.04728	2.83436	down	IRX3	p<0.01
-0.448997	8.46213	-3.48628	0.0014799	0.162258	-1.05633	2.82977	down	HIPK1	p<0.01
-0.268391	10.3675	-3.46248	0.00157729	0.166465	-1.11081	2.80209	down	ARPC2	p<0.01
-0.551722	10.2435	-3.44235	0.00166449	0.170983	-1.15681	2.77872	down	DDIT4L	p<0.01
-0.277282	7.74958	-3.42636	0.00173701	0.170983	-1.19324	2.7602	down	GUK1	p<0.01
-1.24409	8.82503	-3.42403	0.00174781	0.170983	-1.19854	2.7575	down	FRZB	p<0.01
-0.42208	7.53446	-3.41686	0.00178152	0.170983	-1.21486	2.74921	down	TCIRG1	p<0.01
-0.377103	12.5351	-3.41527	0.00178911	0.170983	-1.21849	2.74736	down	MYBPC2	p<0.01
-0.394207	7.72922	-3.41388	0.00179574	0.170983	-1.22164	2.74576	down	RAB40C	p<0.01
-0.273246	13.0301	-3.41366	0.00179679	0.170983	-1.22214	2.7455	down	TPM1	p<0.01
-0.339005	7.22835	-3.40578	0.00183488	0.171264	-1.24006	2.73639	down	OIP5	p<0.01
-0.285649	7.01254	-3.40083	0.00185917	0.171264	-1.25129	2.73068	down	TRAV12-2	p<0.01
-0.285804	8.60938	-3.38836	0.0019218	0.174224	-1.27958	2.71629	down	NPLOC4	p<0.01
-0.451047	8.64821	-3.38641	0.00193181	0.174224	-1.28401	2.71404	down	LMO2	p<0.01
-0.339114	6.69321	-3.38421	0.00194308	0.174224	-1.28898	2.71151	down	CHUK	p<0.01
-0.407191	9.58959	-3.38271	0.00195088	0.174224	-1.2924	2.70977	down	PDZRN3	p<0.01
-0.301443	8.01214	-3.35223	0.00211496	0.175094	-1.36132	2.6747	down	MAFF	p<0.01
-0.311983	8.63364	-3.34443	0.00215909	0.175094	-1.37893	2.66573	down	ZFAS1	p<0.01
-0.271643	7.59001	-3.32394	0.00227915	0.178351	-1.42508	2.64223	down	SHROOM2	p<0.01
-0.296907	8.93308	-3.29865	0.00243616	0.181394	-1.48187	2.61329	down	RSBN1L	p<0.01
-0.291205	8.72945	-3.29476	0.0024612	0.181394	-1.49059	2.60885	down	ASB16	p<0.01
-0.305324	8.05227	-3.29469	0.00246164	0.181394	-1.49074	2.60878	down	B3GALT6	p<0.01
-0.380662	10.2884	-3.29249	0.00247592	0.181394	-1.49567	2.60626	down	SPARC	p<0.01
-0.408068	7.61544	-3.29115	0.00248468	0.181394	-1.49868	2.60473	down	PMEPA1	p<0.01
-0.32668	6.8067	-3.28704	0.00251168	0.181394	-1.50789	2.60004	down	MRGPRX2	p<0.01
-0.560643	9.65793	-3.26593	0.00265474	0.186376	-1.55507	2.57598	down	MLF1	p<0.01
-0.348259	6.78053	-3.24025	0.00283939	0.189049	-1.61232	2.54678	down	LOC105372520	p<0.01
-0.308464	6.71198	-3.22759	0.00293485	0.19182	-1.64046	2.53241	down	HCRT	p<0.01
-0.281147	6.82037	-3.2217	0.00298029	0.192706	-1.65353	2.52574	down	TTC28	p<0.01
-0.269151	7.33287	-3.21645	0.00302142	0.19296	-1.66519	2.51979	down	ZNF248	p<0.01
-0.303562	7.51932	-3.2151	0.00303204	0.19296	-1.66818	2.51826	down	LINC02042	p<0.01
-0.375909	6.45609	-3.20969	0.00307508	0.193491	-1.68017	2.51214	down	WRN	p<0.01
-0.479253	12.0172	-3.19615	0.00318542	0.198157	-1.71015	2.49683	down	ATP2A1	p<0.01
-0.291861	7.24913	-3.19147	0.0032244	0.199537	-1.72048	2.49155	down	EPB41L4A-AS1	p<0.01
-0.366782	7.96673	-3.18997	0.00323702	0.199705	-1.72381	2.48985	down	RNF40	p<0.01
-0.308179	8.46537	-3.17617	0.00335511	0.201724	-1.75426	2.47429	down	PPP3R1	p<0.01
-0.396082	7.34829	-3.17535	0.00336223	0.201724	-1.75606	2.47337	down	MYO15B	p<0.01
-0.3232	8.46188	-3.1733	0.00338019	0.201724	-1.76059	2.47106	down	JUP	p<0.01
-0.329753	8.87927	-3.16862	0.00342148	0.202419	-1.7709	2.46579	down	UTP4	p<0.01
-0.378305	7.39531	-3.15943	0.0035039	0.205488	-1.79113	2.45545	down	NCAM1	p<0.01
-0.355799	7.10192	-3.14902	0.00359958	0.208907	-1.81401	2.44375	down	LINC01010	p<0.01
-0.367915	7.59482	-3.14705	0.00361795	0.209028	-1.81833	2.44154	down	H2AC6	p<0.01
-0.281137	7.82533	-3.13643	0.00371865	0.211642	-1.84164	2.42961	down	TUBA3FP	p<0.01
-0.344821	8.82335	-3.13425	0.00373968	0.211642	-1.84643	2.42717	down	ZNF652	p<0.01
-0.282791	6.83986	-3.11497	0.00393023	0.215394	-1.8886	2.40558	down	NBEAL2	p<0.01
-0.330124	6.89001	-3.11194	0.0039611	0.215394	-1.89524	2.40218	down	LRRK2	p<0.01
-0.361826	8.15673	-3.0897	0.00419415	0.223843	-1.94372	2.37736	down	GPD2	p<0.01
-0.927881	7.25785	-3.07425	0.00436375	0.225152	-1.97733	2.36014	down	HBD	p<0.01
-0.272301	9.33521	-3.07091	0.00440117	0.225216	-1.98456	2.35643	down	TAF13	p<0.01
-0.27557	8.5949	-3.04399	0.00471486	0.228513	-2.04288	2.32653	down	RABEP1	p<0.01
-0.363142	7.52659	-3.01218	0.0051127	0.233587	-2.11143	2.29135	down	EIF4G3	p<0.01
-0.578141	7.49179	-3.00815	0.00516532	0.233587	-2.12009	2.2869	down	ADAM22	p<0.01
-0.35915	9.06341	-3.00174	0.00525019	0.233587	-2.13387	2.27983	down	UHMK1	p<0.01
-0.32121	8.21267	-2.99043	0.00540293	0.233667	-2.15811	2.26737	down	TUBB3	p<0.01
-0.400297	8.63372	-2.9871	0.00544876	0.233879	-2.16525	2.2637	down	ANKRD23	p<0.01
-0.297479	7.16686	-2.97709	0.00558852	0.236154	-2.18665	2.2527	down	RAB23	p<0.01
-0.398205	8.83467	-2.97095	0.005676	0.236154	-2.19977	2.24596	down	HOMER1	p<0.01
-0.268446	8.15562	-2.96341	0.00578514	0.236154	-2.21585	2.23769	down	C18orf25	p<0.01
-0.481572	7.58093	-2.95799	0.00586483	0.236154	-2.22741	2.23174	down	PRKAG3	p<0.01
-0.599434	7.98789	-2.95147	0.005962	0.236154	-2.24128	2.22461	down	TPSG1	p<0.01
-0.267012	8.2793	-2.95057	0.00597558	0.236154	-2.2432	2.22362	down	RNF150	p<0.01
-0.316842	9.42469	-2.9457	0.00604939	0.236154	-2.25356	2.21829	down	SLC24A3	p<0.01
-0.305153	7.57113	-2.94562	0.00605062	0.236154	-2.25373	2.2182	down	GAPDHS	p<0.01
-0.419388	7.72298	-2.9268	0.00634386	0.238347	-2.29366	2.19765	down	LONRF2	p<0.01
-0.428717	8.24865	-2.92677	0.00634436	0.238347	-2.29372	2.19761	down	KCNQ5	p<0.01
-0.383138	8.43168	-2.92655	0.00634782	0.238347	-2.29418	2.19738	down	USP21	p<0.01
-0.267317	6.78429	-2.9222	0.00641755	0.238347	-2.3034	2.19263	down	LOC101928844	p<0.01
-0.308697	7.84592	-2.92087	0.00643895	0.238347	-2.3062	2.19119	down	ZNF138	p<0.01
-0.342364	7.70976	-2.9159	0.00651987	0.238489	-2.31673	2.18576	down	SELL	p<0.01
-0.537577	6.62362	-2.91447	0.00654329	0.238489	-2.31976	2.1842	down	GRB14	p<0.01
-0.302543	6.8085	-2.91065	0.00660623	0.239444	-2.32782	2.18005	down	GPC3	p<0.01
-0.323786	8.05676	-2.88857	0.00698136	0.241053	-2.37436	2.15606	down	MIB2	p<0.01
-0.429822	7.38893	-2.8755	0.00721295	0.242524	-2.40183	2.14189	down	CA12	p<0.01
-0.341444	7.96619	-2.86353	0.00743118	0.245379	-2.42691	2.12894	down	KDELR2	p<0.01
-0.385543	9.24839	-2.84911	0.00770253	0.246259	-2.45708	2.11337	down	CCDC69	p<0.01
-0.289063	6.91046	-2.84777	0.00772808	0.246259	-2.45986	2.11193	down	ZNF236-DT	p<0.01
-0.419094	11.8512	-2.84614	0.00775948	0.246259	-2.46327	2.11017	down	G0S2	p<0.01
-0.405785	7.83946	-2.84313	0.00781768	0.246259	-2.46956	2.10692	down	ACVR1	p<0.01
-0.527487	7.34674	-2.84171	0.00784516	0.246259	-2.47251	2.1054	down	RABGGTA	p<0.01
-0.324026	9.02721	-2.83978	0.00788282	0.246259	-2.47653	2.10332	down	HIBCH	p<0.01
-0.502156	8.25761	-2.83933	0.00789161	0.246259	-2.47747	2.10283	down	SGF29	p<0.01
-0.322666	9.67883	-2.83381	0.00800046	0.246259	-2.48898	2.09689	down	BCRP3	p<0.01
-0.365492	10.5168	-2.83112	0.00805395	0.246259	-2.49458	2.09399	down	NDRG2	p<0.01
-0.373844	7.87488	-2.81509	0.00837976	0.247879	-2.52789	2.07677	down	TTC7B	p<0.01
-0.269566	6.36329	-2.81157	0.00845281	0.248833	-2.53518	2.073	down	ENTPD3	p<0.01
-0.296353	7.71055	-2.81116	0.00846136	0.248833	-2.53603	2.07256	down	LOC285766	p<0.01
-0.286772	7.03169	-2.80851	0.00851695	0.249377	-2.54152	2.06972	down	EPB41L4A	p<0.01
-0.345729	6.70195	-2.7979	0.00874267	0.2506	-2.56348	2.05836	down	PNMA1	p<0.01
-0.445081	9.69799	-2.77721	0.00919921	0.254921	-2.60617	2.03625	down	SGK1	p<0.01
-0.875485	12.5807	-2.77649	0.00921554	0.254921	-2.60766	2.03548	down	MYH1	p<0.01
-0.317613	8.43245	-2.7761	0.00922435	0.254921	-2.60846	2.03506	down	UCKL1	p<0.01
-0.735701	9.6478	-2.7733	0.00928811	0.255005	-2.61423	2.03207	down	PDPK1	p<0.01
-0.276397	7.14615	-2.76955	0.00937383	0.255005	-2.62193	2.02808	down	RPP40	p<0.01
-0.432044	8.56154	-2.76862	0.0093953	0.255005	-2.62385	2.02709	down	CYB561	p<0.01
-0.31285	9.24075	-2.7673	0.00942567	0.255005	-2.62655	2.02569	down	AHCYL1	p<0.01
-0.301198	8.26556	-2.76492	0.00948089	0.255005	-2.63145	2.02315	down	RC3H1	p<0.01
-0.2736	8.30893	-2.76174	0.00955516	0.255005	-2.63798	2.01976	down	ETV4	p<0.01
-0.336046	10.5792	-2.75747	0.0096556	0.255534	-2.64674	2.01522	down	RHOBTB1	p<0.01
-0.449643	7.88605	-2.75033	0.00982573	0.255757	-2.66137	2.00764	down	SCARNA17	p<0.01
-0.294572	6.90956	-2.74857	0.00986808	0.255757	-2.66497	2.00577	down	PLAC8L1	p<0.01
-0.26535	11.3108	-2.74829	0.0098748	0.255757	-2.66554	2.00547	down	AK1	p<0.01
-0.825362	9.22591	-2.74685	0.00990973	0.255978	-2.6685	2.00394	down	NMRK2	p<0.01
0.482009	8.26457	5.50139	5.01875e-06	0.0379579	3.80975	5.2994	up	BTBD9	p<0.01
0.7626	8.23477	5.19492	1.21124e-05	0.0379579	3.06128	4.91677	up	TECRL	p<0.01
0.500617	8.53502	5.14802	1.38611e-05	0.0379579	2.94641	4.8582	up	RSPO3	p<0.01
0.586389	8.671	5.11559	1.52155e-05	0.0379579	2.86694	4.81771	up	ALPK2	p<0.01
0.329712	7.74562	4.95024	2.44676e-05	0.0379579	2.4615	4.61141	up	ZNF385B	p<0.01
0.733693	10.7815	4.94251	2.50169e-05	0.0379579	2.44253	4.60177	up	LDHB	p<0.01
0.453638	8.38211	4.86591	3.11654e-05	0.0403051	2.25467	4.50633	up	ST3GAL2	p<0.01
0.345585	9.65335	4.82399	3.51453e-05	0.0403051	2.15187	4.45413	up	GSTO1	p<0.01
0.402487	7.73398	4.63539	6.02859e-05	0.0572285	1.68975	4.21978	up	AMPD3	p<0.01
0.690174	9.74257	4.57846	7.09186e-05	0.0572285	1.5505	4.14924	up	LPL	p<0.01
0.351611	8.01803	4.45972	9.9436e-05	0.0691732	1.26057	4.00246	up	BCL2L14	p<0.01
0.488562	8.20333	4.39282	0.000120231	0.0780598	1.09758	3.91999	up	CAMSAP2	p<0.01
0.275867	6.98805	4.33873	0.000140134	0.0807442	0.966072	3.85346	up	SPAM1	p<0.01
0.309776	9.73541	4.27874	0.000166024	0.0807442	0.820491	3.77983	up	TPD52L1	p<0.01
0.278756	6.93447	4.27364	0.00016843	0.0807442	0.808136	3.77358	up	CD52	p<0.01
0.27996	8.2179	4.26829	0.000170996	0.0807442	0.79515	3.76701	up	SIRT5	p<0.01
0.457932	6.62418	4.13231	0.000250676	0.103207	0.46661	3.60089	up	KIAA0825	p<0.01
0.372418	6.62278	4.05492	0.0003113	0.113951	0.28057	3.50682	up	OR2W1	p<0.01
0.442008	7.86359	3.96278	0.000402394	0.119381	0.060137	3.39535	up	ALDH6A1	p<0.01
0.3574	9.40289	3.90619	0.000470795	0.12506	-0.0746557	3.32717	up	PPM1B	p<0.01
0.369872	6.3576	3.89211	0.000489505	0.12506	-0.108113	3.31024	up	CGAS	p<0.01
0.355882	9.1073	3.87881	0.000507837	0.126111	-0.139673	3.29428	up	DCXR	p<0.01
0.276812	6.91417	3.8509	0.000548536	0.131098	-0.205845	3.26079	up	CEP162	p<0.01
0.280357	7.16575	3.82193	0.000594135	0.131767	-0.274374	3.22612	up	KRT8P12	p<0.01
0.358198	6.88786	3.79196	0.000645196	0.134414	-0.345118	3.19031	up	FAM200A	p<0.01
0.345883	10.272	3.77951	0.000667646	0.134631	-0.374461	3.17545	up	PAM	p<0.01
0.437709	8.91028	3.703	0.000823236	0.141419	-0.554117	3.08448	up	CDKN1C	p<0.01
0.32558	9.02537	3.63516	0.000990265	0.148938	-0.712439	3.00425	up	ENAH	p<0.01
0.33065	8.10566	3.63002	0.00100417	0.148938	-0.724386	2.99819	up	TAL1	p<0.01
0.308699	7.82984	3.62655	0.00101367	0.148938	-0.73245	2.9941	up	SCARB1	p<0.01
0.309715	7.85211	3.58952	0.00112067	0.150723	-0.818399	2.95052	up	KLHL3	p<0.01
0.376933	8.53349	3.57471	0.00116646	0.15182	-0.852687	2.93313	up	PRKCQ-AS1	p<0.01
0.315914	9.84194	3.55828	0.00121936	0.155326	-0.890656	2.91387	up	SMCO1	p<0.01
0.501082	8.33537	3.55682	0.00122419	0.155326	-0.894038	2.91215	up	LOC101929592	p<0.01
0.322919	6.44471	3.51007	0.00138838	0.162258	-1.00173	2.85749	up	IFIH1	p<0.01
0.371699	6.95169	3.46959	0.00154755	0.166066	-1.09455	2.81035	up	HAS2	p<0.01
0.579945	9.06284	3.46514	0.0015661	0.166465	-1.10473	2.80518	up	XPO4	p<0.01
0.36019	7.97571	3.40824	0.00182288	0.171264	-1.23446	2.73924	up	ANKRD33B	p<0.01
0.313886	8.54551	3.38787	0.0019243	0.174224	-1.28069	2.71573	up	CPED1	p<0.01
0.263196	10.3131	3.34038	0.00218231	0.175532	-1.38806	2.66108	up	PDLIM1	p<0.01
0.632404	9.46679	3.28423	0.0025303	0.181394	-1.51418	2.59683	up	IDI2	p<0.01
0.388599	7.63487	3.28343	0.00253559	0.181394	-1.51596	2.59592	up	B3GNT5	p<0.01
0.266193	7.01491	3.26986	0.00262757	0.185345	-1.54631	2.58045	up	TG	p<0.01
0.287286	11.3176	3.24965	0.00277045	0.187548	-1.5914	2.55745	up	HSPB6	p<0.01
0.281056	6.79733	3.22571	0.00294931	0.19182	-1.64464	2.53028	up	ZNF793	p<0.01
0.285931	6.67557	3.17108	0.00339972	0.201724	-1.76549	2.46856	up	CXCL2	p<0.01
0.777036	6.61149	3.15765	0.00352013	0.20549	-1.79505	2.45344	up	C9orf135	p<0.01
0.293139	8.84476	3.14509	0.00363636	0.209028	-1.82264	2.43933	up	PTPN3	p<0.01
0.399937	7.61944	3.11215	0.00395888	0.215394	-1.89476	2.40243	up	MTMR11	p<0.01
0.304962	6.53902	3.09754	0.00411055	0.221079	-1.92665	2.3861	up	ZNF610	p<0.01
0.322649	6.66634	3.09589	0.00412797	0.221079	-1.93024	2.38426	up	ADCY8	p<0.01
0.362164	8.62961	3.06695	0.00444602	0.225685	-1.99315	2.35203	up	MYLK3	p<0.01
0.323116	6.9516	3.05424	0.00459304	0.228227	-2.02071	2.3379	up	LINC01191	p<0.01
0.29266	7.3954	3.04842	0.00466176	0.228461	-2.03328	2.33145	up	FGF17	p<0.01
0.317965	10.196	3.04778	0.00466941	0.228461	-2.03467	2.33074	up	MRPL41	p<0.01
0.347609	6.86322	3.03731	0.00479584	0.230287	-2.05729	2.31914	up	CCL7	p<0.01
0.290367	7.93002	3.03632	0.00480799	0.230287	-2.05943	2.31804	up	IL2RA	p<0.01
0.419131	7.13338	3.01984	0.00501411	0.233075	-2.09496	2.29981	up	TRIM2	p<0.01
0.334861	6.33758	3.00038	0.00526826	0.233587	-2.13677	2.27833	up	ZCCHC12	p<0.01
0.289719	9.22404	2.99811	0.00529874	0.233667	-2.14165	2.27583	up	SLC41A1	p<0.01
0.344139	8.34574	2.95052	0.00597632	0.236154	-2.2433	2.22357	up	PPP1R16A	p<0.01
0.276707	6.84352	2.9489	0.0060007	0.236154	-2.24674	2.2218	up	SENP1	p<0.01
0.429251	6.73901	2.94677	0.00603307	0.236154	-2.25128	2.21946	up	LINC02028	p<0.01
0.282326	6.8132	2.90968	0.0066223	0.239444	-2.32987	2.17899	up	ALDH7A1	p<0.01
0.301546	7.2413	2.90892	0.00663489	0.23945	-2.33147	2.17817	up	OTOR	p<0.01
0.286765	7.45629	2.90245	0.0067433	0.240352	-2.34513	2.17113	up	VCPKMT	p<0.01
0.376702	9.63504	2.89657	0.00684325	0.240879	-2.35753	2.16474	up	IRF2BP2	p<0.01
0.302972	6.74055	2.88974	0.00696106	0.240879	-2.3719	2.15732	up	ATOH1	p<0.01
0.270839	7.3508	2.87857	0.00715789	0.242145	-2.39538	2.14522	up	PAPPA	p<0.01
0.280923	6.80494	2.87396	0.00724065	0.242827	-2.40506	2.14022	up	KCNH7	p<0.01
0.296314	6.75461	2.83451	0.00798658	0.246259	-2.48752	2.09764	up	SLC49A3	p<0.01
0.27291	6.41767	2.83443	0.00798808	0.246259	-2.48768	2.09756	up	TMEM209	p<0.01
0.370735	7.49262	2.8329	0.00801851	0.246259	-2.49088	2.09591	up	HAUS6	p<0.01
0.276322	7.63022	2.8264	0.00814854	0.246259	-2.50439	2.08892	up	CNTRL	p<0.01
0.272468	7.25858	2.80117	0.0086725	0.249942	-2.55671	2.06186	up	ZNF354A	p<0.01
0.488342	10.1482	2.79906	0.00871777	0.25053	-2.56108	2.05959	up	IL17D	p<0.01
0.345606	8.00658	2.78533	0.00901739	0.253719	-2.58943	2.04492	up	HMGB2	p<0.01
0.287268	8.16839	2.78103	0.00911329	0.254024	-2.5983	2.04033	up	GEMIN7	p<0.01
0.335625	6.53594	2.77801	0.00918128	0.254921	-2.60453	2.0371	up	LRRC71	p<0.01
0.309088	6.669	2.76751	0.00942077	0.255005	-2.62611	2.02591	up	NFIL3	p<0.01
0.398285	8.28246	2.76729	0.00942591	0.255005	-2.62657	2.02568	up	RELL1	p<0.01
0.382444	7.40051	2.76672	0.00943906	0.255005	-2.62774	2.02507	up	IFT57	p<0.01
0.318099	6.66406	2.76299	0.00952584	0.255005	-2.63541	2.0211	up	GAREM1	p<0.01
0.308661	8.31453	2.75126	0.00980327	0.255757	-2.65945	2.00863	up	ZKSCAN3	p<0.01
0.276736	6.72237	2.7489	0.00986016	0.255757	-2.6643	2.00612	up	CDX2	p<0.01
