# Supplementary material for: Establishment and Analysis of a Combined Diagnostic Model of Polycystic Ovary Syndrome with Random Forest and Artificial Neural Network
Source: Biomed Res Int. 2020 Aug 20;2020:2613091. doi: 10.1155/2020/2613091 (PMC7455828; doi:10.1155/2020/2613091)
Supplement: Supplementary 3 — Table S2: significantly enriched gene ontology (GO) terms in biological process (BP), cell components (CC), and molecular function (MF). [file 2613091.f3.xlsx]

## Sheet: GSE6798_go
	ONTOLOGY	ID	Description	GeneRatio	BgRatio	pvalue	p.adjust	qvalue	geneID	Count
GO:0003779	MF	GO:0003779	actin binding	19/208	431/17697	8.48468e-07	0.000519262	0.000436738	MYH4/TMOD1/PDLIM7/TNNI2/MRTFA/TNNT3/LIMCH1/SMTN/ARPC2/MYBPC2/TPM1/SHROOM2/LRRK2/MIB2/MYH1/ENAH/KLHL3/PDLIM1/ADCY8	19
GO:0030016	CC	GO:0030016	myofibril	13/225	224/19717	1.90279e-06	0.00055509	0.00051163	MYH4/TMOD1/PDLIM7/TNNI2/TNNT3/SYNC/MYBPC2/TPM1/JUP/ANKRD23/HOMER1/MYH1/PDLIM1	13
GO:0043292	CC	GO:0043292	contractile fiber	13/225	234/19717	3.08457e-06	0.00055509	0.00051163	MYH4/TMOD1/PDLIM7/TNNI2/TNNT3/SYNC/MYBPC2/TPM1/JUP/ANKRD23/HOMER1/MYH1/PDLIM1	13
GO:0030017	CC	GO:0030017	sarcomere	12/225	204/19717	4.14246e-06	0.00055509	0.00051163	MYH4/TMOD1/PDLIM7/TNNI2/TNNT3/SYNC/MYBPC2/TPM1/JUP/HOMER1/MYH1/PDLIM1	12
GO:0044449	CC	GO:0044449	contractile fiber part	12/225	221/19717	9.37383e-06	0.00094207	0.000868313	MYH4/TMOD1/PDLIM7/TNNI2/TNNT3/SYNC/MYBPC2/TPM1/JUP/HOMER1/MYH1/PDLIM1	12
GO:0005865	CC	GO:0005865	striated muscle thin filament	5/225	31/19717	2.46895e-05	0.0019424	0.00179033	TMOD1/TNNI2/TNNT3/MYBPC2/TPM1	5
GO:0036379	CC	GO:0036379	myofilament	5/225	32/19717	2.89911e-05	0.0019424	0.00179033	TMOD1/TNNI2/TNNT3/MYBPC2/TPM1	5
GO:0030049	BP	GO:0030049	muscle filament sliding	6/216	39/18670	5.30668e-06	0.00749206	0.00700007	MYH4/TMOD1/TNNI2/TNNT3/MYBPC2/TPM1	6
GO:0033275	BP	GO:0033275	actin-myosin filament sliding	6/216	39/18670	5.30668e-06	0.00749206	0.00700007	MYH4/TMOD1/TNNI2/TNNT3/MYBPC2/TPM1	6
GO:0070252	BP	GO:0070252	actin-mediated cell contraction	9/216	116/18670	8.21596e-06	0.00749206	0.00700007	MYH4/TMOD1/TNNI2/FRMD6/TNNT3/MYBPC2/TPM1/ATP2A1/JUP	9
GO:0003009	BP	GO:0003009	skeletal muscle contraction	6/216	43/18670	9.54099e-06	0.00749206	0.00700007	TNNI2/TNNT3/CHUK/ATP2A1/HOMER1/GSTO1	6
